# Supplementary material for: Exploring the Antifungal Activity and Action of Saussurea costus Root Extracts against Candida albicans and Non-albicans Species
Source: MDPI journal article supplement (doi:10.3390/antibiotics11030327), 2022-03-01
Supplement: s1 [file s1]

|                            |                                                      |     |
|----------------------------|------------------------------------------------------|-----|
|                            | +-----+-----+-----+-----+                            |     |
|                            | 10       20       30       40       50               |     |
|                            | +-----+-----+-----+-----+                            |     |
| Cand-Mar.2-EG2018          | AATAGAAAAACACTTGTGTAAGAAAAAATGCAGTTGAGCACTTTTCTTTC   | 50  |
| C.parapsilosis-76          | ..A.....A.....A.....A.....A...                       | 50  |
| C.parapsilosis-LEMI7686    | ..A.....A.....A.....A.....A...                       | 50  |
| C.parapsilosis-79          | - - - - - . . . . . A . . . . . A . . . . .          | 34  |
| C.parapsilosis-ZB012       | - - - - - . . . AG . . . . . A . . . . . A . . . . . | 41  |
| C.parapsilosis-Para-CC-105 | - - - - -                                            | 0   |
| C.parapsilosis-CBS2193     | - - - - -                                            | 0   |
| C.orthopsilosis-LEMI34     | - - - - -                                            | 0   |
| C.parapsilosis-CMC_1826    | - - - - -                                            | 0   |
|                            | +-----+-----+-----+-----+                            |     |
|                            | 60       70       80       90       100              |     |
|                            | +-----+-----+-----+-----+                            |     |
| Cand-Mar.2-EG2018          | T--GTGGTCCTCTTTCCGAAGGT-GAACCTGCGGAAGGATCATTACAGAA   | 97  |
| C.parapsilosis-76          | --..AA.GA..C....T...-.....                           | 97  |
| C.parapsilosis-LEMI7686    | --..AA.GA..C....T...T.....                           | 98  |
| C.parapsilosis-79          | --..AA.GA..-....T...G-.....                          | 80  |
| C.parapsilosis-ZB012       | CTAAAA.GGAAAC....T..AG-AG.....                       | 90  |
| C.parapsilosis-Para-CC-105 | - - - - - . . . . T . . . . .                        | 37  |
| C.parapsilosis-CBS2193     | - - - - - . . . . T . . . . .                        | 37  |
| C.orthopsilosis-LEMI34     | - - - - - . . T . . . . G . . . . .                  | 33  |
| C.parapsilosis-CMC_1826    | - - - - - . . C . . . TC . . . A . . . . .           | 35  |
|                            | +-----+-----+-----+-----+                            |     |
|                            | 110       120       130       140       150          |     |
|                            | +-----+-----+-----+-----+                            |     |
| Cand-Mar.2-EG2018          | TGAAAAGTGCTTAACTGCATTTTTCTTACACATGTGTTTTCTTTTTTT     | 147 |
| C.parapsilosis-76          | . . . . .                                            | 147 |
| C.parapsilosis-LEMI7686    | . . . . .                                            | 148 |
| C.parapsilosis-79          | . . . . .                                            | 130 |
| C.parapsilosis-ZB012       | . . . . .                                            | 140 |
| C.parapsilosis-Para-CC-105 | . . . . .                                            | 87  |
| C.parapsilosis-CBS2193     | . . . . .                                            | 87  |
| C.orthopsilosis-LEMI34     | . . . . - . . . . T - - . . . . .                    | 80  |
| C.parapsilosis-CMC_1826    | . . . . - . . . . T - . . . . .                      | 83  |
|                            | +-----+-----+-----+-----+                            |     |
|                            | 160       170       180       190       200          |     |
|                            | +-----+-----+-----+-----+                            |     |
| Cand-Mar.2-EG2018          | --GAAAACTTTGCTTTGGTAGGCCCTTCTATATGGGGCCTGCCAGAGATTA  | 195 |
| C.parapsilosis-76          | --.....                                              | 195 |
| C.parapsilosis-LEMI7686    | --.....                                              | 196 |
| C.parapsilosis-79          | --.....                                              | 178 |
| C.parapsilosis-ZB012       | --.....                                              | 188 |
| C.parapsilosis-Para-CC-105 | --.....                                              | 135 |
| C.parapsilosis-CBS2193     | --.....                                              | 135 |
| C.orthopsilosis-LEMI34     | TT.....G....C-----AT.....                            | 123 |
| C.parapsilosis-CMC_1826    | TT.....G....C-----AT.....                            | 126 |
|                            | +-----+-----+-----+-----+                            |     |
|                            | 210       220       230       240       250          |     |
|                            | +-----+-----+-----+-----+                            |     |
| Cand-Mar.2-EG2018          | AACTCAACCAAATTTT-ATTTAATGTCAACCGATTATTTAATAGTCAAAA   | 244 |
| C.parapsilosis-76          | . . . . .                                            | 244 |
| C.parapsilosis-LEMI7686    | . . . . .                                            | 245 |
| C.parapsilosis-79          | . . . . .                                            | 227 |
| C.parapsilosis-ZB012       | . . . . .                                            | 237 |
| C.parapsilosis-Para-CC-105 | . . . . .                                            | 184 |
| C.parapsilosis-CBS2193     | . . . . .                                            | 184 |
| C.orthopsilosis-LEMI34     | . . . . .T....AC.....                                | 171 |
| C.parapsilosis-CMC_1826    | . . . . .T....T....AC.....                           | 175 |

|                            |                                                                                         |     |
|----------------------------|-----------------------------------------------------------------------------------------|-----|
|                            | -----+-----+-----+-----+-----+<br>260 270 280 290 300<br>-----+-----+-----+-----+-----+ |     |
| Cand-Mar.2-EG2018          | CTTTCAACAACGGATCTCTTGGTTCTCGCATCGATGAAGAACGCAGCGAA                                      | 294 |
| C.parapsilosis-76          | .....                                                                                   | 294 |
| C.parapsilosis-LEMI7686    | .....                                                                                   | 295 |
| C.parapsilosis-79          | .....                                                                                   | 277 |
| C.parapsilosis-ZB012       | .....                                                                                   | 287 |
| C.parapsilosis-Para-CC-105 | .....                                                                                   | 234 |
| C.parapsilosis-CBS2193     | .....                                                                                   | 234 |
| C.orthopsilosis-LEM134     | .....                                                                                   | 221 |
| C.parapsilosis-CMC_1826    | .....                                                                                   | 225 |

|                            |                                                                                         |     |
|----------------------------|-----------------------------------------------------------------------------------------|-----|
|                            | -----+-----+-----+-----+-----+<br>310 320 330 340 350<br>-----+-----+-----+-----+-----+ |     |
| Cand-Mar.2-EG2018          | ATGCGATAAGTAATATGAATTGCAGATATTCGTGAATCATCGAATCTTTG                                      | 344 |
| C.parapsilosis-76          | .....                                                                                   | 344 |
| C.parapsilosis-LEMI7686    | .....                                                                                   | 345 |
| C.parapsilosis-79          | .....                                                                                   | 327 |
| C.parapsilosis-ZB012       | .....                                                                                   | 337 |
| C.parapsilosis-Para-CC-105 | .....                                                                                   | 284 |
| C.parapsilosis-CBS2193     | .....                                                                                   | 284 |
| C.orthopsilosis-LEM134     | .....                                                                                   | 271 |
| C.parapsilosis-CMC_1826    | .....                                                                                   | 275 |

|                            |                                                                                         |     |
|----------------------------|-----------------------------------------------------------------------------------------|-----|
|                            | -----+-----+-----+-----+-----+<br>360 370 380 390 400<br>-----+-----+-----+-----+-----+ |     |
| Cand-Mar.2-EG2018          | AACGCACATTGCGCCCTTTGGTATTCCAAAGGGCATGCCTGTTTGAGCGT                                      | 394 |
| C.parapsilosis-76          | .....                                                                                   | 394 |
| C.parapsilosis-LEMI7686    | .....                                                                                   | 395 |
| C.parapsilosis-79          | .....                                                                                   | 377 |
| C.parapsilosis-ZB012       | .....                                                                                   | 387 |
| C.parapsilosis-Para-CC-105 | .....                                                                                   | 334 |
| C.parapsilosis-CBS2193     | .....                                                                                   | 334 |
| C.orthopsilosis-LEM134     | .....                                                                                   | 321 |
| C.parapsilosis-CMC_1826    | .....                                                                                   | 325 |

|                            |                                                                                         |     |
|----------------------------|-----------------------------------------------------------------------------------------|-----|
|                            | -----+-----+-----+-----+-----+<br>410 420 430 440 450<br>-----+-----+-----+-----+-----+ |     |
| Cand-Mar.2-EG2018          | CATTTCTCCCTCAAACCCTCGGGTTTGGTGTGAGCGATACGCTGGGTTT                                       | 444 |
| C.parapsilosis-76          | .....                                                                                   | 444 |
| C.parapsilosis-LEMI7686    | .....                                                                                   | 445 |
| C.parapsilosis-79          | .....                                                                                   | 427 |
| C.parapsilosis-ZB012       | .....                                                                                   | 437 |
| C.parapsilosis-Para-CC-105 | .....                                                                                   | 384 |
| C.parapsilosis-CBS2193     | .....                                                                                   | 384 |
| C.orthopsilosis-LEM134     | .....T.....                                                                             | 371 |
| C.parapsilosis-CMC_1826    | .....T.....                                                                             | 375 |

|                            |                                                                                         |     |
|----------------------------|-----------------------------------------------------------------------------------------|-----|
|                            | -----+-----+-----+-----+-----+<br>460 470 480 490 500<br>-----+-----+-----+-----+-----+ |     |
| Cand-Mar.2-EG2018          | GCTTGAAAGAAAGGCGGAGTATAAACTAATGGATAGGTTTTTTC--CACT                                      | 492 |
| C.parapsilosis-76          | .....--.....                                                                            | 492 |
| C.parapsilosis-LEMI7686    | .....--.....                                                                            | 493 |
| C.parapsilosis-79          | .....--.....                                                                            | 475 |
| C.parapsilosis-ZB012       | .....--.....                                                                            | 485 |
| C.parapsilosis-Para-CC-105 | .....--.....                                                                            | 432 |
| C.parapsilosis-CBS2193     | .....--.....                                                                            | 432 |
| C.orthopsilosis-LEM134     | .....T-C....                                                                            | 420 |
| C.parapsilosis-CMC_1826    | .....TTC....                                                                            | 425 |



|                               |                                                      |     |
|-------------------------------|------------------------------------------------------|-----|
|                               | +-----+-----+-----+-----+                            |     |
|                               | 10          20          30          40          50   |     |
|                               | +-----+-----+-----+-----+                            |     |
| Cand-Mar.1-EG2018             | CTCCCGTAAGGGTGCCTGCGGAAGGATCAATACTGATTTGCTTAATTGCA   | 51  |
| C.tropicalis-C9               | .....G.T.AA.....T.....                               | 50  |
| C.tropicalis-YZ27             | .....G.T.AA.....T.....                               | 50  |
| C.tropicalis-YZ1              | .....G.T.AA.....T.....                               | 50  |
| C.tropicalis                  | .....G.T.AA.....T.....                               | 50  |
| C.tropicalis-PHB5             | -----T.....                                          | 35  |
| C.sojae                       | -----T.....                                          | 35  |
| C.labiduridarum-ATCC-MYA-4368 | -----T.....                                          | 36  |
| C.viswanathii-CBS4024         | -----T.....                                          | 36  |
| C.aquae_textoris-ATCC201456   | -----T..A.....                                       | 36  |
| C.saraburiensis-CBS11696      | -----T.....                                          | 36  |
|                               | +-----+-----+-----+-----+                            |     |
|                               | 60          70          80          90          100  |     |
|                               | +-----+-----+-----+-----+                            |     |
| Cand-Mar.1-EG2018             | CCACATGTGTTTTTTTATTGA---ACAAATTT-CTTTGGTGGCGGGAGC--- | 95  |
| C.tropicalis-C9               | .....--T.....                                        | 94  |
| C.tropicalis-YZ27             | .....--T.....                                        | 94  |
| C.tropicalis-YZ1              | .....--T.....                                        | 94  |
| C.tropicalis                  | .....--T.....                                        | 94  |
| C.tropicalis-PHB5             | .....--T.....                                        | 78  |
| C.sojae                       | .....A.TTA.A.....G.....C...A...ATAA                  | 86  |
| C.labiduridarum-ATCC-MYA-4368 | .....CT.--TGA.....-G.....CA.T...GATTTT               | 84  |
| C.viswanathii-CBS4024         | .....C--TGG...GC.-G.....C..T...GA.TCG                | 82  |
| C.aquae_textoris-ATCC201456   | .....C--TGG...GG.-G.....C..T...GA.TCG                | 82  |
| C.saraburiensis-CBS11696      | .....CG.--TTTG.AC.GC.-G.....C..G.C...TTTCG           | 84  |
|                               | +-----+-----+-----+-----+                            |     |
|                               | 110         120         130         140         150  |     |
|                               | +-----+-----+-----+-----+                            |     |
| Cand-Mar.1-EG2018             | -AATCCCACCGCCAGAGGTTATAACTAAACCAAACCTTTTTATTT-AC--AG | 142 |
| C.tropicalis-C9               | -....T.....-.-.-.                                    | 141 |
| C.tropicalis-YZ27             | -....T.....-.-.-.                                    | 141 |
| C.tropicalis-YZ1              | -....T.....-.-.-.                                    | 141 |
| C.tropicalis                  | -....T.....-.-.-.                                    | 141 |
| C.tropicalis-PHB5             | -....T.....-.-.-.                                    | 124 |
| C.sojae                       | A...T.T.....T.-.-.                                   | 135 |
| C.labiduridarum-ATCC-MYA-4368 | --T..TTG.T.....A.....A.....A.T..TT..                 | 133 |
| C.viswanathii-CBS4024         | --T.T..G.....C.C.....-T..C..                         | 128 |
| C.aquae_textoris-ATCC201456   | --T.T..G.....C.C.....-T..C..                         | 128 |
| C.saraburiensis-CBS11696      | --G..G.G.....C.....-C.ACG..                          | 132 |
|                               | +-----+-----+-----+-----+                            |     |
|                               | 160         170         180         190         200  |     |
|                               | +-----+-----+-----+-----+                            |     |
| Cand-Mar.1-EG2018             | TCAAACCTTGATTTATTATTACAA--TAGTCAAACCTTTCA--ACAACGGAT | 189 |
| C.tropicalis-C9               | .....--T.....                                        | 188 |
| C.tropicalis-YZ27             | .....--T.....                                        | 188 |
| C.tropicalis-YZ1              | .....--T.....                                        | 188 |
| C.tropicalis                  | .....CA.....                                         | 190 |
| C.tropicalis-PHB5             | .....--T.....                                        | 171 |
| C.sojae                       | .....AA.....-A.....                                  | 184 |
| C.labiduridarum-ATCC-MYA-4368 | ....-TAC...CC.-.-.-.                                 | 177 |
| C.viswanathii-CBS4024         | ....-CAT-ACG..T.-.-.-.                               | 169 |
| C.aquae_textoris-ATCC201456   | ....-CAT-ACG..T.-.-.-.                               | 169 |
| C.saraburiensis-CBS11696      | ....GAT.A...TA.-.-.-.                                | 176 |

|                               |                                                     |     |
|-------------------------------|-----------------------------------------------------|-----|
|                               | -----+-----+-----+-----+-----                       |     |
|                               | 210 220 230 240 250                                 |     |
|                               | -----+-----+-----+-----+-----                       |     |
| Cand-Mar.1-EG2018             | CTCTTGGTTCTCGCATCGATGAAGAACGCAGCGAAATGCGATACGTAATAT | 240 |
| C.tropicalis-C9               | .....                                               | 239 |
| C.tropicalis-YZ27             | .....                                               | 239 |
| C.tropicalis-YZ1              | .....                                               | 239 |
| C.tropicalis                  | .....                                               | 241 |
| C.tropicalis-PHB5             | .....                                               | 222 |
| C.sojae                       | .....                                               | 235 |
| C.labiduridarum-ATCC-MYA-4368 | .....                                               | 228 |
| C.viswanathii-CBS4024         | .....G..                                            | 220 |
| C.aquae_textoris-ATCC201456   | .....G..                                            | 220 |
| C.saraburiensis-CBS11696      | .....G..                                            | 229 |
|                               | -----+-----+-----+-----+-----                       |     |
|                               | 260 270 280 290 300                                 |     |
|                               | -----+-----+-----+-----+-----                       |     |
| Cand-Mar.1-EG2018             | GAATTGCAGATATTCGTGAATCATCGAATCTTTGAACGCACATTGCGCCCT | 291 |
| C.tropicalis-C9               | .....                                               | 290 |
| C.tropicalis-YZ27             | .....                                               | 290 |
| C.tropicalis-YZ1              | .....                                               | 290 |
| C.tropicalis                  | .....                                               | 292 |
| C.tropicalis-PHB5             | ..G.....G.....                                      | 273 |
| C.sojae                       | .....                                               | 286 |
| C.labiduridarum-ATCC-MYA-4368 | .....                                               | 279 |
| C.viswanathii-CBS4024         | .....A.....                                         | 271 |
| C.aquae_textoris-ATCC201456   | .....                                               | 271 |
| C.saraburiensis-CBS11696      | .....                                               | 280 |
|                               | -----+-----+-----+-----+-----                       |     |
|                               | 310 320 330 340 350                                 |     |
|                               | -----+-----+-----+-----+-----                       |     |
| Cand-Mar.1-EG2018             | TTGGTATTCCAAAGGG-CATGCCTGTTTGAGCGTCATTTCTCCCTCAAACC | 341 |
| C.tropicalis-C9               | .....                                               | 340 |
| C.tropicalis-YZ27             | .....                                               | 340 |
| C.tropicalis-YZ1              | .....                                               | 340 |
| C.tropicalis                  | .....                                               | 342 |
| C.tropicalis-PHB5             | .....G.....                                         | 324 |
| C.sojae                       | .....                                               | 336 |
| C.labiduridarum-ATCC-MYA-4368 | .....                                               | 329 |
| C.viswanathii-CBS4024         | .....                                               | 321 |
| C.aquae_textoris-ATCC201456   | .....G..                                            | 321 |
| C.saraburiensis-CBS11696      | .....G..                                            | 330 |
|                               | -----+-----+-----+-----+-----                       |     |
|                               | 360 370 380 390 400                                 |     |
|                               | -----+-----+-----+-----+-----                       |     |
| Cand-Mar.1-EG2018             | CCCGGGTTTGGTGTTGAGCAATACGCTA-GGTTTGTTTGAAAGAATTTAAC | 391 |
| C.tropicalis-C9               | .....                                               | 390 |
| C.tropicalis-YZ27             | .....                                               | 390 |
| C.tropicalis-YZ1              | .....                                               | 390 |
| C.tropicalis                  | .....                                               | 392 |
| C.tropicalis-PHB5             | .....                                               | 374 |
| C.sojae                       | .TT.....-.....G.....                                | 385 |
| C.labiduridarum-ATCC-MYA-4368 | .T.....C.....CG.--                                  | 378 |
| C.viswanathii-CBS4024         | .G.....C.....CG.--                                  | 369 |
| C.aquae_textoris-ATCC201456   | .G.....C.C.-.....A.CG.--                            | 369 |
| C.saraburiensis-CBS11696      | .G.....TC.....TG.--                                 | 379 |
|                               | -----+-----+-----+-----+-----                       |     |
|                               | 410 420 430 440 450                                 |     |
|                               | -----+-----+-----+-----+-----                       |     |
| Cand-Mar.1-EG2018             | GTGGAAACTTATTTT-AAGCGACTTAGGTTTATCCAAAAACGCTTATTTTG | 441 |
| C.tropicalis-C9               | .....                                               | 440 |
| C.tropicalis-YZ27             | .....                                               | 440 |
| C.tropicalis-YZ1              | .....                                               | 440 |
| C.tropicalis                  | .....                                               | 442 |
| C.tropicalis-PHB5             | .....T..C.....C.....                                | 424 |
| C.sojae                       | .....-..C.T.....TG...A                              | 434 |
| C.labiduridarum-ATCC-MYA-4368 | ....TTT.-T.-A.TT.....T.....-A...T--GC               | 421 |
| C.viswanathii-CBS4024         | ....G...-..-A.T-.....CTA.....-A.GCT---              | 411 |
| C.aquae_textoris-ATCC201456   | .....-..-A.T-.C.....CTA.....-A.GCT---G.             | 411 |
| C.saraburiensis-CBS11696      | ....G...G-.CCA.G..A.....CTA.....CG.A.G.T.CAGC       | 429 |

|                               | 460                                                 | 470 | 480 | 490 | 500 | 510 |     |
|-------------------------------|-----------------------------------------------------|-----|-----|-----|-----|-----|-----|
| Cand-Mar.1-EG2018             | C-TAGTGGCCACCACAATTATTTTCATAAACTTTGACCTCAAATAAGGTAG |     |     |     |     |     | 491 |
| C.tropicalis-C9               | .-.....C.....                                       |     |     |     |     |     | 489 |
| C.tropicalis-YZ27             | .-.....C.....                                       |     |     |     |     |     | 489 |
| C.tropicalis-YZ1              | .-.....C.....                                       |     |     |     |     |     | 489 |
| C.tropicalis                  | .-.....C.....                                       |     |     |     |     |     | 491 |
| C.tropicalis-PHB5             | .-.....CAT.....C.....                               |     |     |     |     |     | 472 |
| C.sojae                       | --.....C..T...--..CT.....C..-...                    |     |     |     |     |     | 479 |
| C.labiduridarum-ATCC-MYA-4368 | TT.TA.A.AAG....T..AAC...T.A..CT.....C.....          |     |     |     |     |     | 472 |
| C.viswanathii-CBS4024         | TGC...C.G.-....C.CAGC...TC...CT.--.....C.....       |     |     |     |     |     | 459 |
| C.aquae_textoris-ATCC201456   | TGC...C.G.-....C.CAGC...TC...CT.....C.....          |     |     |     |     |     | 461 |
| C.saraburiensis-CBS11696      | TGCG.CC.A.G....C.CAAC..C....-CT.....C.....          |     |     |     |     |     | 479 |

|                               | 520                                       | 530 | 540 | 550 |     |
|-------------------------------|-------------------------------------------|-----|-----|-----|-----|
| Cand-Mar.1-EG2018             | GACTACCCGCTGAACTTAAGCATATCAATAAGCGG-GGAAA |     |     |     | 531 |
| C.tropicalis-C9               | .....A.-...                               |     |     |     | 529 |
| C.tropicalis-YZ27             | .....A.....                               |     |     |     | 530 |
| C.tropicalis-YZ1              | .....A.....                               |     |     |     | 530 |
| C.tropicalis                  | .....A.....                               |     |     |     | 532 |
| C.tropicalis-PHB5             | .....A.....                               |     |     |     | 513 |
| C.sojae                       | .....C.G                                  |     |     |     | 515 |
| C.labiduridarum-ATCC-MYA-4368 | .....                                     |     |     |     | 507 |
| C.viswanathii-CBS4024         | .....A...                                 |     |     |     | 494 |
| C.aquae_textoris-ATCC201456   | .....                                     |     |     |     | 495 |
| C.saraburiensis-CBS11696      | .....                                     |     |     |     | 507 |
